# Supplementary material for: Managerial capacity among district health managers and its association with district performance: A comparative descriptive study of six districts in the Eastern Region of Ghana
Source: PubMed Central journal article supplement (PMC6975551; doi:10.1371/journal.pone.0227974), 2020-01-22
Supplement: pone.0227974.s002.pdf [file pone.0227974.s002.pdf]

# District Performance & Scorecard of Key PH Indicators.

Annual Performance Review 2017.

# Introduction

- A **'League of District Performance'** is illustrated for each indicator followed by a **'Performance Gauge'** (PG). The PG as depicted below shows district performance for selected indicators based on a grading system **'A-E'** and scored **'5-1'** respectively. The table then ends with a **'League Table of the Overall Performance'** for the year 2017.

# Methodology

- 17 core PH indicators are selected for assessment as a “League of District Performance”.
- Assessment is based on guidelines used by National to assess regions.
- Each indicator is assessed based on its own Performance Gauge
- Scores were assigned and aggregated to arrive at marks/positions for each quarter
- The range of scores spans
  - 5 Excellent            Deep Green
  - 4 Very Good        Light Green
  - 3 Good                Yellow
  - 2 Satisfactory      Orange
  - 1 Unsatisfactory    Red
- The total marks for the year is an aggregate for the 4Q’s.
- The average for each district is the total marks for the year divided by 4.
- The average number determines the position of the District.

# Methodology cont;

## Performance Gauge (PG)

| Indicator  |           |      |              |                |
|------------|-----------|------|--------------|----------------|
| Best range |           |      |              | Least          |
| A          | B         | C    | D            | E              |
| Excellent  | Very Good | Good | Satisfactory | Unsatisfactory |
| Score      |           |      |              |                |
| 5          | 4         | 3    | 2            | 1              |

# DISTRICTS SCORECARD OF SELECTED INDICATORS, 1ST QUARTER 2017, ER.

| District | OPD per capita | Percentage of Teenage Pregnancies among ANC registrants | Family Planning Acceptance rate | Percentage skilled deliveries | Measles-Rubella2 (MR-2) cov | Under 5 Malaria Case Fatality Rate | % Pregnant women tested HIV positive (PMTCT) | Penta 3 coverage | IPT | ANC | Authorisation Completeness | Authorisation Timeliness | IDSR Weekly Timeliness | IDSR Monthly Completeness | Non Polio AFP Rate | Data Entry Completeness | Data Entry Timeliness | G Total         | Position |
|----------|----------------|---------------------------------------------------------|---------------------------------|-------------------------------|-----------------------------|------------------------------------|----------------------------------------------|------------------|-----|-----|----------------------------|--------------------------|------------------------|---------------------------|--------------------|-------------------------|-----------------------|-----------------|----------|
|          | 5              | 3                                                       | 4                               | 5                             | 5                           | 5                                  | 4                                            | 5                | 1   | 5   | 5                          | 5                        | 2                      | 5                         | 1                  | 2                       | 3                     | 65              | 1        |
|          | 5              | 1                                                       | 4                               | 4                             | 1                           | 5                                  | 4                                            | 5                | 2   | 5   | 5                          | 5                        | 3                      | 5                         | 1                  | 3                       | 4                     | 62              | 2        |
|          | 5              | 1                                                       | 3                               | 4                             | 2                           | 5                                  | 4                                            | 5                | 2   | 4   | 5                          | 5                        | 3                      | 5                         | 1                  | 3                       | 3                     | 60              | 3        |
|          | 2              | 1                                                       | 5                               | 1                             | 5                           | 5                                  | 5                                            | 5                | 2   | 5   | 5                          | 5                        | 3                      | 5                         | 1                  | 2                       | 1                     | 58              | 4        |
|          | 5              | 2                                                       | 5                               | 3                             | 3                           | 5                                  | 4                                            | 5                | 2   | 3   | 5                          | 5                        | 2                      | 5                         | 1                  | 1                       | 2                     | 58              | 4        |
|          | 5              | 4                                                       | 4                               | 4                             | 4                           | 5                                  | 5                                            | 5                | 3   | 2   | 1                          | 1                        | 1                      | 5                         | 1                  | 3                       | 4                     | 57              | 6        |
|          | 3              | 1                                                       | 3                               | 1                             | 1                           | 5                                  | 5                                            | 5                | 5   | 2   | 5                          | 5                        | 4                      | 5                         | 1                  | 2                       | 3                     | 56              | 7        |
|          | 1              | 5                                                       | 3                               | 1                             | 5                           | 5                                  | 2                                            | 5                | 2   | 1   | 5                          | 1                        | 4                      | 5                         | 1                  | 3                       | 3                     | 52              | 8        |
|          | 2              | 1                                                       | 5                               | 1                             | 5                           | 5                                  | 1                                            | 4                | 2   | 2   | 5                          | 1                        | 3                      | 5                         | 1                  | 4                       | 5                     | 52              | 8        |
|          | 2              | 1                                                       | 4                               | 1                             | 2                           | 5                                  | 5                                            | 5                | 3   | 1   | 5                          | 1                        | 3                      | 5                         | 1                  | 3                       | 4                     | 51              | 10       |
|          | 2              | 3                                                       | 3                               | 1                             | 3                           | 5                                  | 1                                            | 5                | 3   | 1   | 5                          | 1                        | 3                      | 5                         | 1                  | 3                       | 3                     | 48              | 11       |
|          | 2              | 1                                                       | 4                               | 1                             | 2                           | 5                                  | 4                                            | 5                | 1   | 1   | 5                          | 1                        | 3                      | 5                         | 1                  | 4                       | 3                     | 48              | 11       |
|          | 5              | 2                                                       | 4                               | 3                             | 2                           | 5                                  | 2                                            | 2                | 1   | 1   | 5                          | 1                        | 4                      | 5                         | 1                  | 2                       | 2                     | 47              | 13       |
|          | 1              | 1                                                       | 2                               | 1                             | 4                           | 5                                  | 5                                            | 5                | 1   | 1   | 1                          | 1                        | 4                      | 5                         | 1                  | 3                       | 5                     | 46              | 14       |
|          | 3              | 1                                                       | 1                               | 5                             | 4                           | 5                                  | 1                                            | 2                | 2   | 5   | 1                          | 1                        | 3                      | 5                         | 1                  | 2                       | 4                     | 46              | 14       |
|          | 1              | 1                                                       | 3                               | 1                             | 2                           | 5                                  | 3                                            | 5                | 1   | 3   | 5                          | 1                        | 1                      | 5                         | 1                  | 2                       | 5                     | 45              | 16       |
|          | 2              | 2                                                       | 5                               | 1                             | 1                           | 5                                  | 5                                            | 5                | 2   | 1   | 5                          | 1                        | 1                      | 5                         | 1                  | 2                       | 1                     | 45              | 16       |
|          | 1              | 1                                                       | 4                               | 1                             | 1                           | 5                                  | 2                                            | 1                | 2   | 1   | 5                          | 5                        | 4                      | 5                         | 1                  | 2                       | 3                     | 44              | 18       |
|          | 3              | 2                                                       | 3                               | 3                             | 1                           | 1                                  | 5                                            | 5                | 1   | 2   | 5                          | 1                        | 1                      | 5                         | 1                  | 2                       | 3                     | 44              | 18       |
|          | 1              | 1                                                       | 4                               | 1                             | 3                           | 5                                  | 1                                            | 1                | 1   | 1   | 5                          | 5                        | 2                      | 5                         | 1                  | 4                       | 2                     | 43              | 20       |
|          | 2              | 1                                                       | 3                               | 1                             | 2                           | 5                                  | 5                                            | 5                | 2   | 1   | 5                          | 1                        | 1                      | 3                         | 1                  | 1                       | 3                     | 42              | 21       |
|          | 2              | 1                                                       | 3                               | 1                             | 2                           | 5                                  | 1                                            | 3                | 2   | 1   | 5                          | 5                        | 1                      | 5                         | 1                  | 2                       | 1                     | 41              | 22       |
|          | 3              | 1                                                       | 3                               | 1                             | 1                           | 5                                  | 5                                            | 1                | 4   | 1   | 1                          | 1                        | 3                      | 5                         | 1                  | 2                       | 3                     | 41              | 22       |
|          | 2              | 1                                                       | 2                               | 1                             | 1                           | 5                                  | 3                                            | 2                | 2   | 1   | 5                          | 1                        | 3                      | 5                         | 1                  | 3                       | 3                     | 41              | 22       |
|          | 1              | 1                                                       | 3                               | 1                             | 2                           | 5                                  | 1                                            | 3                | 1   | 1   | 5                          | 1                        | 3                      | 5                         | 1                  | 3                       | 4                     | 41              | 22       |
|          | 1              | 1                                                       | 1                               | 1                             | 1                           | 5                                  | 5                                            | 2                | 1   | 1   | 5                          | 1                        | 2                      | 5                         | 1                  | 2                       | 1                     | 36 <sup>5</sup> | 26       |

# DISTRICTS SCORECARD OF SELECTED INDICATORS, 2ND QUARTER 2017, ER.

| DISTRICT | OPD per capita | Percentage of Teenage Pregnancies among ANC registrants | Family Planning Accept or rate | Percentage skilled deliveries | Measles - Rubella 2 (MR-2) cov | Under 5 Malaria Case Fatality Rate | % Pregnant women tested HIV positive (PMTCT) | Penta 3 coverage | IPT | ANC | Authorisation Completeness | Authorisation Timeliness | IDSR Weekly Timeliness | IDSR Monthly Completeness | Non Polio AFP Rate | Data Entry Completeness | Data Entry Timeliness | G.Total | Position |
|----------|----------------|---------------------------------------------------------|--------------------------------|-------------------------------|--------------------------------|------------------------------------|----------------------------------------------|------------------|-----|-----|----------------------------|--------------------------|------------------------|---------------------------|--------------------|-------------------------|-----------------------|---------|----------|
|          | 5              | 3                                                       | 1                              | 5                             | 4                              | 5                                  | 5                                            | 5                | 1   | 5   | 3                          | 5                        | 1                      | 4                         | 5                  | 5                       | 5                     | 67      | 1        |
|          | 5              | 3                                                       | 2                              | 5                             | 5                              | 5                                  | 5                                            | 5                | 5   | 1   | 3                          | 5                        | 3                      | 1                         | 3                  | 5                       | 5                     | 66      | 2        |
|          | 5              | 2                                                       | 1                              | 5                             | 2                              | 5                                  | 4                                            | 2                | 2   | 5   | 4                          | 5                        | 5                      | 4                         | 5                  | 5                       | 5                     | 66      | 3        |
|          | 2              | 1                                                       | 3                              | 1                             | 5                              | 5                                  | 4                                            | 5                | 5   | 2   | 4                          | 5                        | 5                      | 4                         | 5                  | 1                       | 5                     | 62      | 4        |
|          | 5              | 2                                                       | 4                              | 4                             | 5                              | 5                                  | 2                                            | 5                | 2   | 2   | 3                          | 5                        | 1                      | 3                         | 4                  | 5                       | 5                     | 62      | 4        |
|          | 5              | 1                                                       | 1                              | 5                             | 1                              | 5                                  | 5                                            | 3                | 2   | 3   | 4                          | 5                        | 5                      | 3                         | 5                  | 1                       | 5                     | 59      | 6        |
|          | 1              | 3                                                       | 1                              | 1                             | 5                              | 5                                  | 1                                            | 5                | 2   | 1   | 4                          | 5                        | 4                      | 4                         | 5                  | 5                       | 5                     | 57      | 7        |
|          | 1              | 1                                                       | 3                              | 1                             | 5                              | 5                                  | 5                                            | 5                | 2   | 1   | 4                          | 5                        | 1                      | 2                         | 5                  | 5                       | 5                     | 56      | 8        |
|          | 4              | 2                                                       | 1                              | 5                             | 3                              | 5                                  | 1                                            | 4                | 2   | 4   | 3                          | 5                        | 1                      | 3                         | 3                  | 5                       | 5                     | 56      | 8        |
|          | 3              | 2                                                       | 2                              | 3                             | 2                              | 5                                  | 5                                            | 4                | 1   | 2   | 3                          | 5                        | 3                      | 4                         | 4                  | 1                       | 5                     | 54      | 10       |
|          | 2              | 1                                                       | 3                              | 1                             | 3                              | 3                                  | 5                                            | 5                | 2   | 1   | 3                          | 5                        | 1                      | 5                         | 3                  | 5                       | 5                     | 53      | 11       |
|          | 3              | 1                                                       | 3                              | 2                             | 2                              | 5                                  | 5                                            | 3                | 3   | 1   | 4                          | 5                        | 1                      | 4                         | 4                  | 1                       | 5                     | 52      | 12       |
|          | 2              | 1                                                       | 5                              | 1                             | 5                              | 5                                  | 1                                            | 5                | 2   | 1   | 4                          | 5                        | 5                      | 3                         | 4                  | 1                       | 1                     | 51      | 13       |
|          | 5              | 2                                                       | 3                              | 5                             | 1                              | 5                                  | 3                                            | 1                | 3   | 1   | 2                          | 5                        | 1                      | 4                         | 4                  | 1                       | 5                     | 51      | 13       |
|          | 1              | 1                                                       | 5                              | 1                             | 2                              | 1                                  | 5                                            | 2                | 3   | 1   | 3                          | 5                        | 1                      | 4                         | 5                  | 5                       | 5                     | 50      | 15       |
|          | 1              | 1                                                       | 1                              | 1                             | 1                              | 5                                  | 5                                            | 1                | 3   | 1   | 4                          | 5                        | 1                      | 4                         | 5                  | 5                       | 5                     | 49      | 16       |
|          | 2              | 2                                                       | 1                              | 1                             | 2                              | 3                                  | 5                                            | 5                | 4   | 1   | 4                          | 5                        | 1                      | 2                         | 5                  | 1                       | 5                     | 49      | 16       |
|          | 2              | 2                                                       | 3                              | 2                             | 1                              | 5                                  | 5                                            | 3                | 3   | 1   | 4                          | 5                        | 2                      | 4                         | 5                  | 1                       | 1                     | 49      | 16       |
|          | 1              | 1                                                       | 3                              | 1                             | 2                              | 5                                  | 5                                            | 2                | 2   | 1   | 4                          | 5                        | 1                      | 4                         | 4                  | 1                       | 5                     | 47      | 19       |
|          | 3              | 1                                                       | 1                              | 2                             | 1                              | 5                                  | 5                                            | 1                | 3   | 1   | 3                          | 5                        | 1                      | 4                         | 4                  | 1                       | 5                     | 46      | 20       |
|          | 1              | 1                                                       | 3                              | 1                             | 2                              | 5                                  | 1                                            | 3                | 1   | 1   | 4                          | 5                        | 1                      | 2                         | 4                  | 5                       | 5                     | 45      | 21       |
|          | 3              | 1                                                       | 1                              | 2                             | 1                              | 5                                  | 1                                            | 3                | 4   | 1   | 3                          | 5                        | 1                      | 3                         | 4                  | 1                       | 5                     | 44      | 22       |
|          | 2              | 2                                                       | 1                              | 1                             | 1                              | 5                                  | 1                                            | 2                | 3   | 1   | 2                          | 5                        | 1                      | 3                         | 3                  | 5                       | 5                     | 43      | 23       |
|          | 2              | 1                                                       | 4                              | 1                             | 1                              | 5                                  | 3                                            | 2                | 1   | 1   | 4                          | 5                        | 1                      | 3                         | 3                  | 1                       | 5                     | 43      | 23       |
|          | 1              | 1                                                       | 1                              | 1                             | 1                              | 5                                  | 1                                            | 4                | 1   | 1   | 4                          | 5                        | 2                      | 2                         | 3                  | 1                       | 5                     | 39      | 25       |
|          | 1              | 1                                                       | 1                              | 1                             | 2                              | 5                                  | 1                                            | 2                | 1   | 1   | 3                          | 4                        | 1                      | 4                         | 4                  | 1                       | 5                     | 38      | 26       |

# DISTRICTS SCORECARD OF SELECTED INDICATORS, 3RD QUARTER 2017,ER.

| District | OPD per capita | Percentage of Teenage Pregnancies among ANC registrants | Family Planning Acceptance rate | Percentage skilled deliveries | Measles - Rubella 2 (MR-2) cov | Under 5 Malaria Case Fatality Rate | % Pregnant women tested HIV positive (PMTCT) | Penta 3 coverage | IPT | ANC | Authorisation Completeness | Authorisation Timeliness | IDSR Weekly Timeliness | IDSR Monthly Completeness | Non Polio AFP Rate | Data Entry Completeness | Data Entry Timeliness | G.Total | Position |
|----------|----------------|---------------------------------------------------------|---------------------------------|-------------------------------|--------------------------------|------------------------------------|----------------------------------------------|------------------|-----|-----|----------------------------|--------------------------|------------------------|---------------------------|--------------------|-------------------------|-----------------------|---------|----------|
|          | 5              | 4                                                       | 1                               | 5                             | 5                              | 5                                  | 5                                            | 5                | 1   | 5   | 5                          | 5                        | 4                      | 5                         | 5                  | 5                       | 5                     | 75      | 1        |
|          | 2              | 1                                                       | 3                               | 1                             | 5                              | 5                                  | 3                                            | 5                | 3   | 1   | 5                          | 5                        | 4                      | 5                         | 5                  | 4                       | 4                     | 61      | 2        |
|          | 5              | 1                                                       | 3                               | 3                             | 5                              | 5                                  | 1                                            | 5                | 4   | 2   | 5                          | 5                        | 3                      | 5                         | 1                  | 3                       | 5                     | 61      | 3        |
|          | 5              | 2                                                       | 1                               | 5                             | 1                              | 5                                  | 1                                            | 4                | 2   | 5   | 5                          | 5                        | 4                      | 5                         | 1                  | 5                       | 5                     | 61      | 3        |
|          | 1              | 1                                                       | 3                               | 1                             | 4                              | 5                                  | 5                                            | 5                | 3   | 1   | 5                          | 5                        | 4                      | 5                         | 5                  | 3                       | 4                     | 60      | 5        |
|          | 5              | 4                                                       | 2                               | 4                             | 4                              | 5                                  | 5                                            | 5                | 3   | 2   | 5                          | 1                        | 4                      | 5                         | 1                  | 1                       | 4                     | 60      | 5        |
|          | 2              | 2                                                       | 3                               | 1                             | 1                              | 5                                  | 5                                            | 4                | 3   | 1   | 5                          | 5                        | 4                      | 5                         | 5                  | 3                       | 5                     | 59      | 7        |
|          | 2              | 2                                                       | 1                               | 1                             | 5                              | 5                                  | 5                                            | 5                | 3   | 3   | 5                          | 1                        | 4                      | 5                         | 1                  | 5                       | 5                     | 58      | 8        |
|          | 5              | 2                                                       | 2                               | 3                             | 1                              | 5                                  | 2                                            | 2                | 2   | 1   | 5                          | 5                        | 3                      | 5                         | 5                  | 5                       | 4                     | 57      | 9        |
|          | 4              | 1                                                       | 1                               | 1                             | 1                              | 5                                  | 4                                            | 1                | 4   | 1   | 5                          | 5                        | 3                      | 5                         | 5                  | 5                       | 5                     | 56      | 10       |
|          | 1              | 1                                                       | 3                               | 1                             | 3                              | 5                                  | 5                                            | 5                | 1   | 1   | 5                          | 5                        | 4                      | 5                         | 5                  | 3                       | 3                     | 56      | 10       |
|          | 1              | 1                                                       | 1                               | 1                             | 5                              | 5                                  | 4                                            | 5                | 3   | 1   | 5                          | 5                        | 4                      | 5                         | 1                  | 3                       | 5                     | 55      | 12       |
|          | 3              | 2                                                       | 1                               | 1                             | 3                              | 5                                  | 4                                            | 5                | 3   | 1   | 5                          | 3                        | 4                      | 5                         | 1                  | 4                       | 5                     | 55      | 13       |
|          | 3              | 1                                                       | 1                               | 1                             | 1                              | 5                                  | 5                                            | 2                | 3   | 2   | 5                          | 5                        | 4                      | 5                         | 5                  | 3                       | 3                     | 54      | 14       |
|          | 2              | 3                                                       | 5                               | 1                             | 1                              | 5                                  | 4                                            | 4                | 3   | 1   | 5                          | 1                        | 4                      | 5                         | 1                  | 5                       | 4                     | 54      | 14       |
|          | 1              | 1                                                       | 4                               | 1                             | 4                              | 5                                  | 1                                            | 5                | 1   | 1   | 5                          | 5                        | 4                      | 5                         | 1                  | 5                       | 5                     | 54      | 14       |
|          | 1              | 1                                                       | 2                               | 1                             | 1                              | 5                                  | 5                                            | 5                | 1   | 1   | 5                          | 5                        | 4                      | 5                         | 5                  | 3                       | 3                     | 53      | 17       |
|          | 2              | 1                                                       | 3                               | 1                             | 2                              | 5                                  | 5                                            | 4                | 1   | 1   | 5                          | 5                        | 4                      | 5                         | 1                  | 3                       | 5                     | 53      | 17       |
|          | 1              | 1                                                       | 3                               | 1                             | 2                              | 5                                  | 5                                            | 3                | 1   | 1   | 5                          | 1                        | 4                      | 5                         | 5                  | 5                       | 5                     | 53      | 17       |
|          | 3              | 1                                                       | 1                               | 5                             | 4                              | 5                                  | 1                                            | 4                | 3   | 3   | 5                          | 1                        | 4                      | 5                         | 1                  | 4                       | 3                     | 53      | 17       |
|          | 3              | 2                                                       | 2                               | 2                             | 2                              | 1                                  | 2                                            | 5                | 1   | 1   | 5                          | 5                        | 4                      | 5                         | 1                  | 5                       | 5                     | 51      | 21       |
|          | 2              | 1                                                       | 1                               | 1                             | 1                              | 5                                  | 1                                            | 2                | 2   | 1   | 5                          | 5                        | 4                      | 5                         | 5                  | 4                       | 3                     | 48      | 22       |
|          | 3              | 2                                                       | 1                               | 4                             | 1                              | 1                                  | 5                                            | 5                | 1   | 3   | 5                          | 1                        | 2                      | 5                         | 1                  | 5                       | 3                     | 48      | 22       |
|          | 2              | 1                                                       | 1                               | 1                             | 1                              | 5                                  | 5                                            | 2                | 2   | 1   | 5                          | 5                        | 4                      | 5                         | 1                  | 5                       | 5                     | 47      | 24       |
|          | 1              | 1                                                       | 1                               | 1                             | 1                              | 5                                  | 1                                            | 5                | 1   | 1   | 5                          | 1                        | 4                      | 5                         | 1                  | 3                       | 3                     | 40      | 25       |

# DISTRICTS SCORECARD OF SELECTED INDICATORS, 4TH QUARTER 2017,ER.

| District | OPD per capita | Percentage of Teenage Pregnancies among ANC registrants | Family Planning Acceptance rate | Percentage skilled deliveries | Measles-Rubella2 (MR-2) cov | Under 5 Malaria Case Fatality Rate | % Pregnant women tested HIV positive(PMTCT) | Penta 3 coverage | IPT 3 | ANC Coverage | Authorization Completeness | Authorization Timeliness | IDSR Weekly Timeliness | IDSR Monthly Completeness | Non Polio AFP Rate | Data Entry Completeness | Data Entry Timeliness | G Total | Position |
|----------|----------------|---------------------------------------------------------|---------------------------------|-------------------------------|-----------------------------|------------------------------------|---------------------------------------------|------------------|-------|--------------|----------------------------|--------------------------|------------------------|---------------------------|--------------------|-------------------------|-----------------------|---------|----------|
|          | 5              | 3                                                       | 1                               | 5                             | 5                           | 5                                  | 5                                           | 5                | 1     | 5            | 5                          | 5                        | 5                      | 5                         | 3                  | 5                       | 5                     | 73      | 1        |
|          | 5              | 1                                                       | 1                               | 5                             | 5                           | 5                                  | 5                                           | 5                | 1     | 3            | 5                          | 5                        | 5                      | 5                         | 5                  | 5                       | 4                     | 70      | 2        |
|          | 1              | 1                                                       | 1                               | 1                             | 5                           | 5                                  | 5                                           | 5                | 2     | 5            | 5                          | 5                        | 5                      | 5                         | 5                  | 5                       | 5                     | 66      | 3        |
|          | 5              | 2                                                       | 3                               | 4                             | 5                           | 5                                  | 5                                           | 5                | 5     | 2            | 5                          | 1                        | 5                      | 5                         | 1                  | 3                       | 3                     | 64      | 4        |
|          | 5              | 4                                                       | 1                               | 5                             | 5                           | 5                                  | 5                                           | 5                | 3     | 2            | 5                          | 5                        | 5                      | 5                         | 1                  | 1                       | 1                     | 63      | 5        |
|          | 1              | 1                                                       | 4                               | 1                             | 5                           | 5                                  | 5                                           | 5                | 1     | 2            | 5                          | 5                        | 5                      | 5                         | 3                  | 5                       | 4                     | 62      | 6        |
|          | 2              | 3                                                       | 5                               | 1                             | 1                           | 3                                  | 5                                           | 4                | 5     | 1            | 5                          | 5                        | 5                      | 5                         | 1                  | 5                       | 5                     | 61      | 7        |
|          | 5              | 2                                                       | 3                               | 4                             | 3                           | 5                                  | 4                                           | 2                | 1     | 1            | 5                          | 5                        | 5                      | 5                         | 1                  | 5                       | 5                     | 61      | 7        |
|          | 3              | 3                                                       | 1                               | 1                             | 5                           | 5                                  | 5                                           | 5                | 3     | 1            | 5                          | 5                        | 5                      | 5                         | 1                  | 4                       | 3                     | 60      | 9        |
|          | 1              | 1                                                       | 1                               | 1                             | 5                           | 5                                  | 5                                           | 5                | 3     | 1            | 5                          | 5                        | 5                      | 5                         | 1                  | 5                       | 5                     | 59      | 10       |
|          | 3              | 2                                                       | 1                               | 3                             | 5                           | 5                                  | 1                                           | 5                | 1     | 2            | 5                          | 5                        | 5                      | 5                         | 1                  | 5                       | 5                     | 59      | 10       |
|          | 4              | 2                                                       | 1                               | 5                             | 2                           | 1                                  | 1                                           | 5                | 2     | 5            | 5                          | 5                        | 5                      | 5                         | 3                  | 3                       | 3                     | 57      | 12       |
|          | 3              | 1                                                       | 1                               | 1                             | 5                           | 5                                  | 1                                           | 4                | 3     | 1            | 5                          | 5                        | 5                      | 5                         | 3                  | 4                       | 4                     | 56      | 13       |
|          | 2              | 1                                                       | 3                               | 1                             | 2                           | 5                                  | 4                                           | 3                | 1     | 1            | 5                          | 5                        | 5                      | 5                         | 5                  | 3                       | 3                     | 54      | 14       |
|          | 1              | 1                                                       | 3                               | 1                             | 5                           | 1                                  | 5                                           | 5                | 3     | 1            | 5                          | 5                        | 5                      | 5                         | 2                  | 3                       | 3                     | 54      | 14       |
|          | 1              | 2                                                       | 1                               | 1                             | 5                           | 5                                  | 5                                           | 5                | 1     | 1            | 5                          | 1                        | 5                      | 5                         | 1                  | 4                       | 4                     | 52      | 16       |
|          | 4              | 2                                                       | 1                               | 1                             | 1                           | 5                                  | 5                                           | 1                | 1     | 1            | 5                          | 5                        | 4                      | 5                         | 1                  | 5                       | 5                     | 52      | 16       |
|          | 2              | 1                                                       | 1                               | 1                             | 1                           | 5                                  | 5                                           | 1                | 2     | 1            | 5                          | 5                        | 5                      | 5                         | 3                  | 4                       | 3                     | 50      | 18       |
|          | 4              | 1                                                       | 1                               | 5                             | 2                           | 5                                  | 1                                           | 4                | 3     | 2            | 5                          | 1                        | 5                      | 4                         | 1                  | 3                       | 3                     | 50      | 18       |
|          | 1              | 1                                                       | 1                               | 1                             | 1                           | 5                                  | 5                                           | 1                | 2     | 1            | 5                          | 5                        | 4                      | 5                         | 1                  | 5                       | 5                     | 49      | 20       |
|          | 1              | 1                                                       | 1                               | 1                             | 4                           | 5                                  | 1                                           | 5                | 1     | 1            | 5                          | 5                        | 5                      | 5                         | 1                  | 4                       | 3                     | 49      | 20       |
|          | 2              | 2                                                       | 1                               | 1                             | 2                           | 5                                  | 3                                           | 4                | 2     | 1            | 5                          | 5                        | 5                      | 5                         | 1                  | 3                       | 2                     | 49      | 20       |
|          | 1              | 1                                                       | 4                               | 1                             | 3                           | 5                                  | 1                                           | 3                | 1     | 1            | 5                          | 5                        | 5                      | 5                         | 1                  | 4                       | 3                     | 49      | 20       |
|          | 2              | 3                                                       | 4                               | 1                             | 5                           | 1                                  | 4                                           | 4                | 2     | 1            | 1                          | 1                        | 5                      | 5                         | 1                  | 3                       | 3                     | 46      | 24       |
|          | 1              | 1                                                       | 2                               | 1                             | 2                           | 5                                  | 1                                           | 5                | 1     | 1            | 5                          | 1                        | 5                      | 5                         | 1                  | 3                       | 3                     | 43      | 25       |
|          | 1              | 1                                                       | 2                               | 1                             | 1                           | 1                                  | 5                                           | 2                | 1     | 1            | 5                          | 1                        | 5                      | 5                         | 1                  | 5                       | 5                     | 43      | 26       |



## DISTRICT LEAGUE TABLE, JAN-DEC 2017, ER.

| District   | QTR 1 | QTR 2 | QTR 3 | QTR 4 | G. Total | Average | Postn. |
|------------|-------|-------|-------|-------|----------|---------|--------|
|            | 65    | 67    | 75    | 73    | 280      | 70.00   | 1      |
|            | 62    | 66    | 61    | 57    | 246      | 61.50   | 2      |
|            | 57    | 66    | 60    | 63    | 246      | 61.50   | 2      |
|            | 58    | 62    | 61    | 64    | 245      | 61.25   | 4      |
|            | 58    | 62    | 58    | 66    | 244      | 61.00   | 5      |
|            | 60    | 59    | 48    | 70    | 237      | 59.25   | 6      |
|            | 52    | 51    | 61    | 62    | 226      | 56.50   | 7      |
|            | 52    | 57    | 55    | 59    | 223      | 55.75   | 8      |
|            | 47    | 51    | 57    | 61    | 216      | 54.00   | 9      |
|            | 48    | 49    | 55    | 60    | 212      | 53.00   | 10     |
|            | 56    | 44    | 54    | 56    | 210      | 52.50   | 11     |
|            | 42    | 53    | 60    | 54    | 209      | 52.25   | 12     |
|            | 45    | 49    | 54    | 61    | 209      | 52.25   | 12     |
|            | 51    | 52    | 59    | 46    | 208      | 52.00   | 14     |
|            | 44    | 54    | 51    | 59    | 208      | 52.00   | 14     |
|            | 46    | 56    | 56    | 49    | 207      | 51.75   | 16     |
|            | 46    | 56    | 53    | 50    | 205      | 51.25   | 17     |
|            | 48    | 43    | 53    | 54    | 198      | 49.50   | 18     |
|            | 43    | 50    | 54    | 49    | 196      | 49.00   | 19     |
|            | 41    | 46    | 56    | 52    | 195      | 48.75   | 20     |
|            | 44    | 49    | 47    | 49    | 189      | 47.25   | 21     |
|            | 45    | 47    | 53    | 43    | 188      | 47.00   | 22     |
|            | 41    | 45    | 53    | 43    | 182      | 45.50   | 23     |
|            | 41    | 38    | 48    | 50    | 177      | 44.25   | 24     |
|            | 41    | 43    | 39    | 49    | 172      | 43.00   | 25     |
| 12/11/2019 | 36    | 39    | 40    | 52    | 167      | 41.75   | 26     |

District Performance/Scorecard of Selected PH Indicators.
